# Supplementary material for: Reductions by aquatitanium(ii)
Source: Royal Society of Chemistry journal article supplement (doi:10.1039/b416975c), 2005-01-01
Supplement: b416975c.pdf [file b416975c.pdf]

Electronic Supplementary Information for Dalton Transactions  
This journal is © The Royal Society of Chemistry 2005

## REDUCTIONS BY AQUATITANIUM(II)

Zhiyong Yang and Edwin S. Gould

### SUPPLEMENTARY MATERIALS

Tables S-1 to S-6. Detailed kinetic data for redox reactions.

Table S-1. Reduction of  $[(\text{NH}_3)_5\text{Co}(\text{H}_2\text{O})]^{3+}$  by Ti(II); kinetic data<sup>a</sup>

| [Ti(II)], mM | [H <sup>+</sup> ], M | $10k_2, \text{M}^{-1} \text{s}^{-1}$ <sup>b</sup> |
|--------------|----------------------|---------------------------------------------------|
| 7.3          | 0.50                 | 0.70 (0.63)                                       |
| 11.0         | 0.50                 | 0.72 (0.63)                                       |
| 16.0         | 0.50                 | 0.77 (0.63)                                       |
| 25.0         | 0.50                 | 0.70 (0.63)                                       |
| 6.6          | 0.20                 | 1.64 (1.58)                                       |
| 6.6          | 0.25                 | 1.29 (1.27)                                       |
| 6.6          | 0.30                 | 1.05 (1.06)                                       |
| 6.6          | 0.35                 | 0.85 (0.90)                                       |
| 6.6          | 0.40                 | 0.77 (0.79)                                       |
| 6.6          | 0.45                 | 0.70 (0.70)                                       |
| 6.6          | 0.50                 | 0.65 (0.63)                                       |

---

<sup>a</sup>Reactions were carried out at 22 °C;  $\mu = 0.50\text{M}$  ( $\text{HClO}_4/\text{NaClO}_4$ ),  $[\text{Co}^{\text{III}}] = 1.0\text{-}1.5 \text{ mM}$ ;  $\lambda = 491 \text{ nm}$ . <sup>b</sup>Second order rate constants; parenthetical values were calculated using rate law (4) in text, taking  $k = 3.2 \times 10^{-2} \text{ s}^{-1}$ .

Table S-2. Reduction of 2,5-dichloro-3,6-dihydroxybenzoquinone (CHBzqn) with titanium(II); kinetic data.<sup>a</sup>

| [Ti(II)], mM | [H <sup>+</sup> ], M | 10 <sup>-2</sup> k <sub>2</sub> , M <sup>-1</sup> s <sup>-1</sup> <sup>b</sup> |
|--------------|----------------------|--------------------------------------------------------------------------------|
| 0.17         | 0.50                 | 6.2 (6.5)                                                                      |
| 0.33         | 0.50                 | 6.2 (6.5)                                                                      |
| 0.50         | 0.50                 | 5.7 (6.5)                                                                      |
| 0.66         | 0.50                 | 5.8 (6.5)                                                                      |
| 0.17         | 0.050                | 10.8 (11.2)                                                                    |
| 0.17         | 0.10                 | 9.0 (8.6)                                                                      |
| 0.17         | 0.20                 | 7.6 (7.3)                                                                      |
| 0.17         | 0.30                 | 6.9 (6.9)                                                                      |
| 0.17         | 0.40                 | 6.5 (6.7)                                                                      |

---

<sup>a</sup>Reactions were carried out at 22 °C;  $\mu = 0.50$  (HClO<sub>4</sub>/NaClO<sub>4</sub>); [CHBzqn] = 0.025 mM throughout;  $\lambda = 302$  nm. <sup>b</sup>Second order constants; parenthetical values were calculated using rate law (7) and parameters in Table 2.

Electronic Supplementary Information for Dalton Transactions  
This journal is © The Royal Society of Chemistry 2005



Table S-3. Reduction of 2,5-dichloro-3,6-dihydroxybenzoquinone (CHBzqn) with titanium(III); kinetic data.<sup>a</sup>

| [Ti(III)], mM | [H <sup>+</sup> ], M | 10 <sup>-4</sup> k <sub>2</sub> , M <sup>-1</sup> s <sup>-1</sup> <sup>b</sup> |
|---------------|----------------------|--------------------------------------------------------------------------------|
| 0.056         | 0.50                 | 0.69 (0.66)                                                                    |
| 0.110         | 0.50                 | 0.59 (0.66)                                                                    |
| 0.23          | 0.50                 | 0.61 (0.66)                                                                    |
| 0.50          | 0.50                 | 0.63 (0.66)                                                                    |
| 0.056         | 0.050                | 5.8 (6.6)                                                                      |
| 0.056         | 0.10                 | 3.7 (3.3)                                                                      |
| 0.056         | 0.15                 | 2.6 (2.2)                                                                      |
| 0.056         | 0.20                 | 1.73 (1.66)                                                                    |
| 0.056         | 0.30                 | 1.14 (1.10)                                                                    |
| 0.056         | 0.40                 | 0.80 (0.83)                                                                    |
| 0.056         | 0.45                 | 0.71 (0.74)                                                                    |
| 0.056         | 0.50                 | 0.63 (0.66)                                                                    |

---

<sup>a</sup>Reactions were carried out at 22 °C;  $\mu = 0.50$  M (HClO<sub>4</sub>/NaClO<sub>4</sub>), [CHBzqn] = 0.010-0.012 mM;  $\lambda = 302$  nm. <sup>b</sup>Second order rate constants; parenthetical values were calculated using rate law and parameter in Table 3.

Table S-4 Reduction of benzoquinone (Bzqn) with titanium(III); kinetic data.<sup>a</sup>

| [Ti(III)], mM | [H <sup>+</sup> ], M | 10 <sup>4</sup> k <sub>2</sub> , M <sup>-1</sup> s <sup>-1</sup> <sup>b</sup> |
|---------------|----------------------|-------------------------------------------------------------------------------|
| 0.15          | 0.50                 | 1.43 (1.51)                                                                   |
| 0.30          | 0.50                 | 1.43 (1.51)                                                                   |
| 0.45          | 0.50                 | 1.38 (1.51)                                                                   |
| 0.60          | 0.50                 | 1.33 (1.51)                                                                   |
| 0.30          | 0.050                | 5.7 (5.9)                                                                     |
| 0.30          | 0.10                 | 3.5 (3.5)                                                                     |
| 0.30          | 0.15                 | 2.7 (2.6)                                                                     |
| 0.30          | 0.20                 | 2.3 (2.2)                                                                     |
| 0.30          | 0.30                 | 2.00 (1.70)                                                                   |
| 0.30          | 0.40                 | 1.60 (1.64)                                                                   |

---

<sup>a</sup>Reactions were carried out at 22 °C;  $\mu = 0.50$  M (HClO<sub>4</sub>/NaClO<sub>4</sub>); [Bzqn] = 0.020 mM throughout;  $\lambda = 502$  nm. <sup>b</sup>Second order rate constants; parenthetical values were calculated using rate laws and parameters in Table 3.

Table S-5. Reduction of tri-iodide with titanium(II); kinetic data<sup>a</sup>

| [Ti(II)], mM | [I <sup>-</sup> ], M | [H <sup>+</sup> ], M | k, M <sup>-1</sup> s <sup>-1</sup> <sup>b</sup> |
|--------------|----------------------|----------------------|-------------------------------------------------|
| 1.66         | 0.050                | 0.050                | 0.30 (0.27)                                     |
| 3.33         | 0.050                | 0.050                | 0.32 (0.27)                                     |
| 6.66         | 0.050                | 0.050                | 0.33 (0.27)                                     |
| 13.3         | 0.050                | 0.050                | 0.31 (0.27)                                     |
| 3.0          | 0.050                | 0.10                 | 1.30 (1.34)                                     |
| 3.0          | 0.050                | 0.11                 | 1.10 (1.22)                                     |
| 3.0          | 0.050                | 0.15                 | 0.85 (0.80)                                     |
| 3.0          | 0.050                | 0.20                 | 0.65 (0.67)                                     |
| 3.0          | 0.050                | 0.30                 | 0.45 (0.45)                                     |
| 3.0          | 0.050                | 0.40                 | 0.39 (0.34)                                     |
| 3.0          | 0.0010               | 0.50                 | 4.0 (3.6)                                       |
| 3.0          | 0.0020               | 0.50                 | 2.2 (2.6)                                       |
| 3.0          | 0.0050               | 0.50                 | 1.60 (1.42)                                     |
| 3.0          | 0.010                | 0.50                 | 0.82 (0.84)                                     |
| 3.0          | 0.020                | 0.50                 | 0.49 (0.50)                                     |
| 3.0          | 0.050                | 0.50                 | 0.30 (0.27)                                     |
| 3.0          | 0.080                | 0.50                 | 0.20 (0.21)                                     |
| 3.0          | 0.100                | 0.50                 | 0.174 (0.187)                                   |



---

<sup>a</sup>Reactions were carried out at 22 °C;  $\mu = 0.50$  M (HCl/LiCl/CF<sub>3</sub>SO<sub>3</sub>H); [I<sub>3</sub><sup>-</sup>] = 0.010 mM throughout;  $\lambda = 352$  nm. <sup>b</sup>Second order rate constants; parenthetical values were calculated using rate law (8) in text and parameters in Table 2.

Table S-6. Reduction of tri-iodide with titanium(III); kinetic data<sup>a</sup>

| [Ti(III)], mM | [I <sup>-</sup> ], M | [H <sup>+</sup> ], M | <i>k</i> , M <sup>-1</sup> s <sup>-1</sup> <sup>b</sup> |
|---------------|----------------------|----------------------|---------------------------------------------------------|
| 9.3           | 0.050                | 0.50                 | 0.34 (0.33)                                             |
| 18.6          | 0.050                | 0.50                 | 0.36 (0.33)                                             |
| 28.0          | 0.050                | 0.50                 | 0.33 (0.33)                                             |
| 37.3          | 0.050                | 0.50                 | 0.33 (0.33)                                             |
| 20.0          | 0.0010               | 0.50                 | 2.6 (2.6)                                               |
| 20.0          | 0.0050               | 0.50                 | 1.07 (1.10)                                             |
| 20.0          | 0.010                | 0.50                 | 0.69 (0.71)                                             |
| 20.0          | 0.015                | 0.50                 | 0.56 (0.56)                                             |
| 20.0          | 0.020                | 0.50                 | 0.51 (0.48)                                             |
| 20.0          | 0.030                | 0.50                 | 0.42 (0.40)                                             |
| 20.0          | 0.040                | 0.50                 | 0.38 (0.33)                                             |
| 8.5           | 0.050                | 0.10                 | 16.0 (16.3)                                             |
| 8.5           | 0.050                | 0.15                 | 1.06 (1.08)                                             |
| 8.5           | 0.050                | 0.20                 | 0.78 (0.81)                                             |
| 8.5           | 0.050                | 0.25                 | 0.64 (0.65)                                             |
| 8.5           | 0.050                | 0.30                 | 0.55 (0.54)                                             |
| 8.5           | 0.050                | 0.40                 | 0.30 (0.41)                                             |
| 8.5           | 0.050                | 0.50                 | 0.33 (0.33)                                             |

---

<sup>a</sup>Reactions were carried out at 22 °C;  $\mu = 0.50$  M (HCl/LiCl/CF<sub>3</sub>SO<sub>3</sub>H); [I<sub>3</sub><sup>-</sup>] = 0.020 mM throughout,  $\lambda = 352$  nm. <sup>b</sup>Second order rate constants; parenthetical values were calculated using rate law (8) in text and parameters in Table 3.
